# Supplementary material for: An In Vivo (Gallus gallus) Feeding Trial Demonstrating the Enhanced Iron Bioavailability Properties of the Fast Cooking Manteca Yellow Bean (Phaseolus vulgaris L.)
Source: PubMed Central journal article supplement (PMC6724231; doi:10.3390/nu11081768), 2019-08-01
Supplement: nutrients-11-01768-s001.pdf [file nutrients-11-01768-s001.pdf]

**Table S1. Sequences of Forward and Reverse Primers used for PCR Reactions to Measure Gene Expression of Iron Transporter Proteins in the Proximal Duodenum.**

| <b>Gene</b> | <b>Forward Primer (5'-3')</b> | <b>Reverse Primer (5'-3')</b> | <b>Base Pair Length</b> | <b>GI Identifier</b> |
|-------------|-------------------------------|-------------------------------|-------------------------|----------------------|
| DMT-1       | TTGATTCAGAGCCTCCCATTAG        | GCGAGGAGTAGGCTTGTATTT         | 101                     | 206597489            |
| Ferroportin | CTCAGCAATCACTGGCATCA          | ACTGGGCAACTCCAGAAATAAG        | 98                      | 61098365             |
| DcytB       | CATGTGCATTCTCTTCCAAAGTC       | CTCCTTGGTGACCGCATTAT          | 103                     | 20380692             |
| 18S rRNA    | GCAAGACGAACTAAAGCGAAAG        | TCGGAACTACGACGGTATCT          | 100                     | 7262899              |

DMT-1, Divalent Metal Transporter-1; DcytB, Duodenal cytochrome B; 18S rRNA, 18S Ribosomal subunit.

**Table S2. Phytate Concentrations of Each Dietary Component in Bean Based Diets.<sup>1</sup>**

| <b>Ingredient</b>               | <b>Phytate<br/>(mg/g)<sup>2</sup></b> | <b>Phytate / Iron<br/>molar ratio</b> |
|---------------------------------|---------------------------------------|---------------------------------------|
| Ervilha ( <i>Manteca</i> )      | 13.7 ± 0.25 <sup>a</sup>              | 14.0 ± 0.39 <sup>ab</sup>             |
| Uyole 98 ( <i>Amarillo</i> )    | 13.0 ± 0.20 <sup>ab</sup>             | 13.9 ± 0.08 <sup>bc</sup>             |
| PI527538 ( <i>Njano</i> )       | 13.4 ± 0.05 <sup>a</sup>              | 13.4 ± 0.16 <sup>cd</sup>             |
| Snowdon ( <i>white kidney</i> ) | 13.6 ± 0.25 <sup>a</sup>              | 15.3 ± 0.38 <sup>a</sup>              |
| Red Hawk ( <i>red kidney</i> )  | 12.8 ± 0.20 <sup>b</sup>              | 13.4 ± 0.18 <sup>d</sup>              |
| Potato ( <i>white</i> )         | 1.31 ± 0.01 <sup>c</sup>              | 7.62 ± 0.11 <sup>f</sup>              |
| Rice ( <i>white/polished</i> )  | 0.76 ± 0.05 <sup>e</sup>              | 9.95 ± 0.52 <sup>e</sup>              |
| Cabbage ( <i>white</i> )        | 1.08 ± 0.05 <sup>d</sup>              | 4.63 ± 0.37 <sup>g</sup>              |

<sup>1</sup>Values are means ± SEM of five replicates for each ingredient. Means sharing the same letter in each column are not significantly different at  $p < 0.05$ . <sup>2</sup>Total phytate concentrations measured as milligrams per gram of cooked, drained, lyophilized and milled ingredient (dry weight).

**Table S3. Cumulative Feed Intake During the 6 Weeks of Consuming Bean Based Diets.<sup>1</sup>**

| Bean Diet                       | Feed Intake (g)          |                          |                          |                          |                         |                        |
|---------------------------------|--------------------------|--------------------------|--------------------------|--------------------------|-------------------------|------------------------|
|                                 | Day 7                    | Day 14                   | Day 21                   | Day 28                   | Day 35                  | Day 42                 |
| Ervilha ( <i>Manteca</i> )      | 96.30 ± 5.5 <sup>b</sup> | 300.6 ± 6.3 <sup>b</sup> | 575.5 ± 1.6 <sup>b</sup> | 890.7 ± 3.9 <sup>b</sup> | 1412 ± 9.1 <sup>b</sup> | 2167 ± 49 <sup>a</sup> |
| Uyole 98 ( <i>Amarillo</i> )    | 141.0 ± 4.8 <sup>a</sup> | 357.3 ± 7.0 <sup>a</sup> | 615.7 ± 7.6 <sup>a</sup> | 950.7 ± 8.4 <sup>a</sup> | 1416 ± 19 <sup>ab</sup> | 2231 ± 59 <sup>a</sup> |
| PI527538 ( <i>Njano</i> )       | 129.7 ± 4.7 <sup>a</sup> | 342.8 ± 7.1 <sup>a</sup> | 614.6 ± 7.1 <sup>a</sup> | 1014 ± 14 <sup>a</sup>   | 1504 ± 23 <sup>a</sup>  | 2127 ± 49 <sup>a</sup> |
| Snowdon ( <i>white kidney</i> ) | 104.4 ± 4.3 <sup>b</sup> | 268.8 ± 5.9 <sup>c</sup> | 420.4 ± 4.2 <sup>c</sup> | 639.2 ± 9.5 <sup>c</sup> | 995.6 ± 30 <sup>c</sup> | 1605 ± 84 <sup>b</sup> |
| Red Hawk ( <i>red kidney</i> )  | 112.5 ± 1.0 <sup>b</sup> | 268.7 ± 1.4 <sup>c</sup> | 384.8 ± 4.9 <sup>d</sup> | 561.5 ± 10 <sup>d</sup>  | 843.3 ± 18 <sup>d</sup> | 1239 ± 51 <sup>c</sup> |

<sup>1</sup>Values are means ± SEM (n = 10 – 13 animals per treatment group). Means sharing the same letter in each column are not significantly different at  $p < 0.05$ .

**Table S4. Cumulative Iron Intake During the 6 Weeks of Consuming Bean Based Diets.<sup>1</sup>**

| Bean Diet                       | Iron Intake (mg)           |                           |                           |                           |                           |                          |
|---------------------------------|----------------------------|---------------------------|---------------------------|---------------------------|---------------------------|--------------------------|
|                                 | Day 7                      | Day 14                    | Day 21                    | Day 28                    | Day 35                    | Day 42                   |
| Ervilha ( <i>Manteca</i> )      | 5.200 ± 0.30 <sup>bc</sup> | 16.23 ± 0.34 <sup>b</sup> | 31.07 ± 0.09 <sup>b</sup> | 48.10 ± 0.21 <sup>b</sup> | 76.23 ± 0.49 <sup>b</sup> | 117.0 ± 2.4 <sup>a</sup> |
| Uyole 98 ( <i>Amarillo</i> )    | 6.628 ± 0.20 <sup>a</sup>  | 16.79 ± 0.38 <sup>b</sup> | 28.94 ± 0.36 <sup>b</sup> | 44.68 ± 0.41 <sup>b</sup> | 66.56 ± 0.93 <sup>c</sup> | 104.8 ± 2.8 <sup>b</sup> |
| PI527538 ( <i>Njano</i> )       | 7.131 ± 0.26 <sup>a</sup>  | 18.86 ± 0.39 <sup>a</sup> | 33.80 ± 0.94 <sup>a</sup> | 55.82 ± 0.80 <sup>a</sup> | 82.37 ± 1.2 <sup>a</sup>  | 117.0 ± 2.7 <sup>a</sup> |
| Snowdon ( <i>white kidney</i> ) | 4.907 ± 0.20 <sup>c</sup>  | 12.63 ± 0.28 <sup>c</sup> | 19.76 ± 0.20 <sup>c</sup> | 30.04 ± 0.45 <sup>c</sup> | 46.79 ± 1.4 <sup>d</sup>  | 75.43 ± 3.9 <sup>c</sup> |
| Red Hawk ( <i>red kidney</i> )  | 5.850 ± 0.05 <sup>b</sup>  | 13.98 ± 0.07 <sup>c</sup> | 20.01 ± 0.26 <sup>c</sup> | 29.20 ± 0.53 <sup>c</sup> | 43.85 ± 0.96 <sup>d</sup> | 64.43 ± 2.7 <sup>c</sup> |

<sup>1</sup>Values are means ± SEM (n = 10 – 13 animals per treatment group). Means sharing the same letter in each column are not significantly different at  $p < 0.05$ .

**Table S5. Body Weights During the 6 Weeks of Consuming Bean Based Diets.<sup>1</sup>**

| <b>Bean Diet</b>                | <b>Weight (g)</b>          |                           |                          |                          |                          |                         |
|---------------------------------|----------------------------|---------------------------|--------------------------|--------------------------|--------------------------|-------------------------|
|                                 | <b>Day 7</b>               | <b>Day 14</b>             | <b>Day 21</b>            | <b>Day 28</b>            | <b>Day 35</b>            | <b>Day 42</b>           |
| Ervilha ( <i>Manteca</i> )      | 89.89 ± 0.51 <sup>ab</sup> | 179.1 ± 0.33 <sup>a</sup> | 319.6 ± 4.9 <sup>a</sup> | 556.2 ± 12 <sup>a</sup>  | 784.5 ± 17 <sup>a</sup>  | 952.4 ± 23 <sup>a</sup> |
| Uyole 98 ( <i>Amarillo</i> )    | 86.43 ± 1.3 <sup>ab</sup>  | 161.1 ± 2.4 <sup>a</sup>  | 257.8 ± 7.1 <sup>a</sup> | 466.9 ± 13 <sup>b</sup>  | 642.9 ± 18 <sup>b</sup>  | 726.6 ± 44 <sup>b</sup> |
| PI527538 ( <i>Njano</i> )       | 95.45 ± 2.4 <sup>a</sup>   | 183.8 ± 4.9 <sup>a</sup>  | 308.4 ± 7.0 <sup>a</sup> | 561.4 ± 13 <sup>a</sup>  | 782.7 ± 17 <sup>a</sup>  | 949.4 ± 21 <sup>a</sup> |
| Snowdon ( <i>white kidney</i> ) | 80.82 ± 1.6 <sup>b</sup>   | 128.3 ± 3.2 <sup>b</sup>  | 193.0 ± 9.0 <sup>b</sup> | 307.6 ± 14 <sup>c</sup>  | 417.8 ± 21 <sup>c</sup>  | 489.1 ± 24 <sup>c</sup> |
| Red Hawk ( <i>red kidney</i> )  | 70.11 ± 1.1 <sup>c</sup>   | 98.35 ± 1.4 <sup>c</sup>  | 132.2 ± 5.4 <sup>c</sup> | 198.5 ± 6.1 <sup>d</sup> | 265.6 ± 8.8 <sup>d</sup> | 312.5 ± 12 <sup>d</sup> |

<sup>1</sup>Values are means ± SEM (n = 10 – 13 animals per treatment group). Means sharing the same letter in each column are not significantly different at  $p < 0.05$ . Body weights averaged 43 grams at the start of the experiment.

**Table S6. Total Body Hemoglobin Iron (Hb-Fe) During the 6 Weeks of Consuming Bean Based Diets.<sup>1</sup>**

| Bean Diet                       | Hb-Fe (mg)                |                           |                           |                           |                           |                           |
|---------------------------------|---------------------------|---------------------------|---------------------------|---------------------------|---------------------------|---------------------------|
|                                 | Day 7                     | Day 14                    | Day 21                    | Day 28                    | Day 35                    | Day 42                    |
| Ervilha ( <i>Manteca</i> )      | 2.546 ± 0.02 <sup>a</sup> | 4.996 ± 0.05 <sup>a</sup> | 9.367 ± 0.12 <sup>a</sup> | 16.64 ± 0.34 <sup>a</sup> | 25.16 ± 0.77 <sup>a</sup> | 30.72 ± 1.1 <sup>a</sup>  |
| Uyole 98 ( <i>Amarillo</i> )    | 2.411 ± 0.02 <sup>a</sup> | 4.285 ± 0.05 <sup>b</sup> | 6.841 ± 0.31 <sup>c</sup> | 12.62 ± 0.27 <sup>b</sup> | 20.23 ± 0.75 <sup>b</sup> | 23.92 ± 1.4 <sup>b</sup>  |
| PI527538 ( <i>Njano</i> )       | 2.436 ± 0.06 <sup>a</sup> | 4.999 ± 0.12 <sup>a</sup> | 7.986 ± 0.12 <sup>b</sup> | 14.80 ± 0.25 <sup>b</sup> | 23.11 ± 0.11 <sup>b</sup> | 26.93 ± 0.24 <sup>b</sup> |
| Snowdon ( <i>white kidney</i> ) | 2.248 ± 0.04 <sup>b</sup> | 3.710 ± 0.10 <sup>c</sup> | 5.004 ± 0.19 <sup>d</sup> | 8.690 ± 0.38 <sup>c</sup> | 12.87 ± 0.61 <sup>c</sup> | 15.17 ± 0.75 <sup>c</sup> |
| Red Hawk ( <i>red kidney</i> )  | 1.694 ± 0.04 <sup>c</sup> | 2.265 ± 0.02 <sup>d</sup> | 2.754 ± 0.11 <sup>e</sup> | 4.999 ± 0.17 <sup>d</sup> | 7.720 ± 0.32 <sup>d</sup> | 9.516 ± 0.31 <sup>d</sup> |

<sup>1</sup>Values are means ± SEM (n = 10 – 13 animals per treatment group). Means sharing the same letter in each column are not significantly different at  $p < 0.05$ . Total body hemoglobin iron averaged 0.97 milligrams at the start of the experiment.

**Table S7. Hemoglobin (Hb) Concentrations.<sup>1</sup>**

| <b>Bean Diet</b>                | <b>Hb (g/L)</b>           |                           |                           |                            |                           |                            |
|---------------------------------|---------------------------|---------------------------|---------------------------|----------------------------|---------------------------|----------------------------|
|                                 | <b>Day 7</b>              | <b>Day 14</b>             | <b>Day 21</b>             | <b>Day 28</b>              | <b>Day 35</b>             | <b>Day 42</b>              |
| Ervilha ( <i>Manteca</i> )      | 99.53 ± 0.34 <sup>a</sup> | 97.83 ± 0.45 <sup>a</sup> | 100.4 ± 0.37 <sup>a</sup> | 105.2 ± 0.10 <sup>a</sup>  | 109.5 ± 0.47 <sup>a</sup> | 112.1 ± 0.51 <sup>ab</sup> |
| Uyole 98 ( <i>Amarillo</i> )    | 98.16 ± 0.35 <sup>a</sup> | 93.46 ± 0.68 <sup>a</sup> | 92.65 ± 0.54 <sup>a</sup> | 95.22 ± 0.29 <sup>bc</sup> | 110.7 ± 0.58 <sup>a</sup> | 116.0 ± 0.49 <sup>a</sup>  |
| PI527538 ( <i>Njano</i> )       | 89.67 ± 0.26 <sup>a</sup> | 95.59 ± 0.51 <sup>a</sup> | 91.20 ± 0.45 <sup>a</sup> | 92.83 ± 0.24 <sup>bc</sup> | 103.9 ± 0.43 <sup>a</sup> | 100.1 ± 0.43 <sup>b</sup>  |
| Snowdon ( <i>white kidney</i> ) | 97.79 ± 0.48 <sup>a</sup> | 101.4 ± 0.31 <sup>a</sup> | 91.70 ± 0.52 <sup>a</sup> | 99.26 ± 0.16 <sup>ab</sup> | 104.6 ± 1.2 <sup>a</sup>  | 109.2 ± 0.62 <sup>ab</sup> |
| Red Hawk ( <i>red kidney</i> )  | 84.90 ± 0.35 <sup>a</sup> | 80.25 ± 0.41 <sup>b</sup> | 74.58 ± 0.29 <sup>b</sup> | 88.85 ± 0.25 <sup>c</sup>  | 102.5 ± 0.51 <sup>a</sup> | 106.9 ± 0.54 <sup>ab</sup> |

<sup>1</sup>Values are means ± SEM (n = 10 – 13 animals per treatment group). Means sharing the same letter in each column are not significantly different at  $p < 0.05$ . Concentrations of hemoglobin averaged 79.74 grams per liter at the start of the experiment.

**Table S8. Hemoglobin Maintenance Efficacy (HME) During the 6 Weeks of Consuming Bean Based Diets.<sup>1</sup>**

| Bean Diet                       | HME (%)                    |                           |                           |                           |                           |                           |
|---------------------------------|----------------------------|---------------------------|---------------------------|---------------------------|---------------------------|---------------------------|
|                                 | Day 7                      | Day 14                    | Day 21                    | Day 28                    | Day 35                    | Day 42                    |
| Ervilha ( <i>Manteca</i> )      | 31.36 ± 0.46 <sup>a</sup>  | 24.88 ± 0.23 <sup>a</sup> | 27.05 ± 0.45 <sup>a</sup> | 32.60 ± 0.65 <sup>a</sup> | 31.69 ± 0.87 <sup>a</sup> | 25.72 ± 0.50 <sup>a</sup> |
| Uyole 98 ( <i>Amarillo</i> )    | 22.02 ± 0.66 <sup>b</sup>  | 19.96 ± 0.73 <sup>b</sup> | 20.42 ± 0.66 <sup>b</sup> | 26.09 ± 0.60 <sup>b</sup> | 27.84 ± 0.78 <sup>b</sup> | 21.74 ± 0.91 <sup>b</sup> |
| PI527538 ( <i>Njano</i> )       | 20.68 ± 0.56 <sup>b</sup>  | 21.38 ± 0.40 <sup>b</sup> | 20.85 ± 0.29 <sup>b</sup> | 24.75 ± 0.29 <sup>b</sup> | 26.80 ± 0.22 <sup>b</sup> | 22.30 ± 0.43 <sup>b</sup> |
| Snowdon ( <i>white kidney</i> ) | 26.98 ± 0.86 <sup>ab</sup> | 22.04 ± 0.31 <sup>b</sup> | 20.42 ± 0.91 <sup>b</sup> | 25.64 ± 0.83 <sup>b</sup> | 25.18 ± 0.92 <sup>b</sup> | 19.04 ± 0.73 <sup>b</sup> |
| Red Hawk ( <i>red kidney</i> )  | 12.44 ± 0.56 <sup>c</sup>  | 9.304 ± 0.21 <sup>c</sup> | 8.986 ± 0.55 <sup>c</sup> | 13.76 ± 0.35 <sup>c</sup> | 15.34 ± 0.44 <sup>c</sup> | 13.29 ± 0.10 <sup>c</sup> |

<sup>1</sup>Values are means ± SEM (n = 10 – 13 animals per treatment group). Means sharing the same letter in each column are not significantly different at  $p < 0.05$ .
